# Supplementary material for: Genome-wide analysis of long non-coding RNAs (lncRNAs) in tea plants (Camellia sinensis) lateral roots in response to nitrogen application
Source: Front Plant Sci. 2023 Feb 24;14:1080427. doi: 10.3389/fpls.2023.1080427 (PMC9998519; doi:10.3389/fpls.2023.1080427)
Supplement: Supplementary file 2 [file Table_2.xls]

## Sheet: Sheet1
KEGG_A_class	KEGG_B_class	Pathway	Pvalue	Qvalue	Pathway ID	Genes	K_IDs
Metabolism	Carbohydrate metabolism	Pentose and glucuronate interconversions	0.00918776	0.484968	ko00040	evm.model.Cha06g011080;LJ.13202.1;LJ.15484.1;LJ.18647.1;LJ.32484.1;LJ.33247.1;LJ.33522.1;LJ.34535.2;evm.model.ChaUn30406.2;LJ.36003.1	K01051+K01051+K01051+K12447+K01051+K01051+K01783+K01051+K01184+K01051
Metabolism	Biosynthesis of other secondary metabolites	Betalain biosynthesis	0.0121355	0.484968	ko00965	evm.model.Cha01g015240;evm.model.Cha11g012470	K15777+K15777
Environmental Information Processing	Signal transduction	Plant hormone signal transduction	0.0149661	0.484968	ko04075	LJ.68.6;LJ.4293.1;evm.model.Cha03g008300;LJ.11853.1;evm.model.Cha06g001390;evm.model.Cha06g012260;LJ.13289.1;LJ.13317.1;LJ.13899.1;evm.model.Cha07g010740;LJ.15353.1;LJ.18745.1;LJ.18885.1;LJ.20831.1;LJ.21716.1;evm.model.Cha11g012040;evm.model.Cha14g006190;LJ.29166.1;evm.model.ChaUn11742.7;evm.model.ChaUn12188.1;LJ.30881.1;LJ.31838.1;LJ.33982.1;LJ.36829.1	K14509+K14432+K13464+K14488+K14488+K14488+K14506+K14491+K13464+K14517+K14484+K13946+K14512+K14488+K14503+K14490+K14517+K13464+K14485+K14484+K14496+K14487+K14506+K14492
Metabolism	Metabolism of terpenoids and polyketides	Brassinosteroid biosynthesis	0.0175743	0.484968	ko00905	LJ.5436.1;evm.model.Cha03g005590;evm.model.Cha03g005580;LJ.31454.1	K12640+K12638+K12638+K12640
Metabolism	Metabolism of cofactors and vitamins	Pantothenate and CoA biosynthesis	0.0210856	0.484968	ko00770	evm.model.Cha03g008630;LJ.5999.1;LJ.6950.2;LJ.19231.2;evm.model.Cha11g009670;LJ.35228.1	K01652+K01598+K00826+K01687+K01918+K02201
Metabolism	Amino acid metabolism	Glycine, serine and threonine metabolism	0.0343215	0.495759	ko00260	LJ.3148.1;LJ.9821.1;evm.model.Cha06g000170;LJ.13496.1;evm.model.Cha08g016510;LJ.21519.2;LJ.23683.1;LJ.26952.1;LJ.36850.2;evm.model.ChaUn11658.1	K01733+K15633+K00872+K00276+K01696+K02437+K02437+K02437+K12235+K01696
Metabolism	Metabolism of terpenoids and polyketides	Diterpenoid biosynthesis	0.0344876	0.495759	ko00904	evm.model.Cha11g008500;evm.model.Cha14g001160;evm.model.ChaUn6565.4	K17961+K04124+K05282
Metabolism	Biosynthesis of other secondary metabolites	Glucosinolate biosynthesis	0.0344876	0.495759	ko00966	LJ.6950.2;LJ.36041.1;evm.model.ChaUn8071.1	K00826+K22321+K11820
Metabolism	Global and overview maps	2-Oxocarboxylic acid metabolism	0.0408004	0.521339	ko01210	evm.model.Cha03g007350;evm.model.Cha03g008630;LJ.6950.2;LJ.9418.1;LJ.19231.2;evm.model.Cha10g006950;LJ.26323.2;evm.model.ChaUn14401.1;evm.model.ChaUn8071.1	K00818+K01652+K00826+K00030+K01687+K00030+K00814+K01438+K11820
Metabolism	Metabolism of cofactors and vitamins	Vitamin B6 metabolism	0.055944	0.590097	ko00750	LJ.3148.1;LJ.5704.1;evm.model.Cha04g021600	K01733+K06215+K06215
Metabolism	Lipid metabolism	Sphingolipid metabolism	0.056444	0.590097	ko00600	LJ.14557.1;LJ.15538.1;LJ.24779.5;LJ.29733.1;evm.model.ChaUn9213.1	K04712+K04711+K07407+K01190+K12309
Metabolism	Global and overview maps	Biosynthesis of secondary metabolites	0.0725525	0.695295	ko01110	LJ.404.1;evm.model.Cha01g004820;LJ.640.1;LJ.1376.1;LJ.1543.1;LJ.1640.6;LJ.1921.1;evm.model.Cha01g018470;evm.model.Cha01g019530;evm.model.Cha01g023540;LJ.3148.1;LJ.3253.1;LJ.3348.1;evm.model.Cha02g008860;LJ.5436.1;evm.model.Cha03g005590;evm.model.Cha03g005580;evm.model.Cha03g007350;evm.model.Cha03g008630;LJ.6081.1;LJ.6194.1;LJ.6573.1;evm.model.Cha03g015810;LJ.6950.2;LJ.9418.1;evm.model.Cha04g02082…	K01803+K23452+K00430+K10703+K00891+K05906+K00234+K01762+K00588+K23452+K01733+K00948+K01599+K13832+K12640+K12638+K12638+K00818+K01652+K00766+K05278+K00021+K13082+K00826+K00030+K00966+K15633+K12626+K15086+K00430+K11517+K00872+K15095+K15227+K13496+K00276+K23095+K01188+K08695+K00430+K01696+K01613+K18857+K12447+K13066+K01687+K01640+K00030+K01807+K02437+K00430+K01918+K14423+K00948+K02437+K19222+K01904+…
Metabolism	Biosynthesis of other secondary metabolites	Flavonoid biosynthesis	0.0869991	0.769607	ko00941	evm.model.Cha01g019530;LJ.6194.1;evm.model.Cha03g015810;evm.model.Cha07g006420;LJ.28745.1	K00588+K05278+K13082+K08695+K13065
Metabolism	Metabolism of other amino acids	Glutathione metabolism	0.0987885	0.811477	ko00480	LJ.360.1;evm.model.Cha05g011690;LJ.12908.1;LJ.13780.4;LJ.22226.1;LJ.23425.1;LJ.26667.1;evm.model.ChaUn10910.3;LJ.33116.1;evm.model.ChaUn26564.1;LJ.36023.1;LJ.36318.1	K21888+K00799+K21456+K00799+K00434+K00432+K22596+K00432+K00799+K00799+K00799+K00799
Metabolism	Lipid metabolism	Fatty acid degradation	0.114743	0.854783	ko00071	evm.model.Cha08g005340;LJ.18598.9;evm.model.ChaUn10710.1;LJ.29910.1;LJ.30516.1;LJ.32110.1;evm.model.ChaUn9626.1	K07517+K18857+K07517+K18857+K07517+K18857+K18857
Metabolism	Metabolism of cofactors and vitamins	Biotin metabolism	0.122503	0.854783	ko00780	LJ.30663.1;evm.model.ChaUn22024.2;LJ.35325.1	K09458+K00059+K00208
Genetic Information Processing	Translation	Ribosome	0.127173	0.854783	ko03010	LJ.1029.1;LJ.1120.1;evm.model.Cha01g023140;evm.model.Cha02g004660;evm.model.Cha02g006650;LJ.4201.1;LJ.4318.1;LJ.4990.1;LJ.5267.1;evm.model.Cha08g005700;evm.model.Cha08g017580;evm.model.Cha10g006170;LJ.21967.1;LJ.21994.2;LJ.23948.1;LJ.25291.1;LJ.29417.1;LJ.30907.1;LJ.31731.1;LJ.32737.1;evm.model.ChaUn19967.1;LJ.33499.1	K02974+K02961+K02915+K02881+K02985+K02925+K02930+K02980+K02916+K02875+K02946+K02962+K02887+K02865+K02941+K02890+K02921+K02933+K02900+K02959+K02906+K02886
Metabolism	Global and overview maps	Biosynthesis of amino acids	0.141095	0.854783	ko01230	LJ.404.1;LJ.1543.1;LJ.3148.1;LJ.3253.1;evm.model.Cha02g008860;evm.model.Cha03g007350;evm.model.Cha03g008630;LJ.6081.1;LJ.6950.2;LJ.9418.1;LJ.9821.1;evm.model.Cha06g000170;LJ.13008.2;evm.model.Cha08g016510;LJ.19231.2;evm.model.Cha10g006950;evm.model.Cha10g010990;LJ.23671.1;LJ.26323.2;evm.model.ChaUn14401.1;LJ.32131.1;LJ.33522.1;evm.model.ChaUn6927.8;evm.model.ChaUn11658.1;evm.model.ChaUn24806.1	K01803+K00891+K01733+K00948+K13832+K00818+K01652+K00766+K00826+K00030+K15633+K00872+K15227+K01696+K01687+K00030+K01807+K00948+K00814+K01438+K00927+K01783+K01739+K01696+K00765
Metabolism	Amino acid metabolism	Valine, leucine and isoleucine biosynthesis	0.142259	0.854783	ko00290	evm.model.Cha03g008630;LJ.6950.2;LJ.19231.2	K01652+K00826+K01687
Metabolism	Biosynthesis of other secondary metabolites	Phenylpropanoid biosynthesis	0.148658	0.854783	ko00940	LJ.640.1;evm.model.Cha01g019530;evm.model.Cha05g009470;LJ.12998.1;evm.model.Cha06g018600;LJ.16947.1;evm.model.Cha09g008790;evm.model.Cha11g007930;LJ.25412.3;evm.model.Cha15g007200;LJ.28745.1;LJ.33652.1;evm.model.ChaUn23323.2	K00430+K00588+K00430+K12355+K01188+K00430+K13066+K00430+K01904+K01904+K13065+K00430+K00430
Metabolism	Metabolism of other amino acids	Selenocompound metabolism	0.168306	0.898868	ko00450	LJ.4605.1;LJ.25571.1;evm.model.ChaUn6927.8	K00384+K11717+K01739
Metabolism	Metabolism of cofactors and vitamins	Ubiquinone and other terpenoid-quinone biosynthesis	0.171957	0.898868	ko00130	evm.model.Cha06g016410;LJ.19846.1;LJ.23930.2;LJ.25412.3;evm.model.Cha15g007200	K23095+K12501+K19222+K01904+K01904
Metabolism	Carbohydrate metabolism	Galactose metabolism	0.189571	0.93019	ko00052	evm.model.Cha06g002530;LJ.18647.1;LJ.24779.5;LJ.29733.1;evm.model.ChaUn9213.1;LJ.37843.1	K18819+K12447+K07407+K01190+K12309+K01784
Metabolism	Lipid metabolism	alpha-Linolenic acid metabolism	0.194127	0.93019	ko00592	LJ.18598.9;LJ.29856.1;LJ.29910.1;LJ.32110.1;evm.model.ChaUn9626.1	K18857+K22389+K18857+K18857+K18857
Metabolism	Glycan biosynthesis and metabolism	Other types of O-glycan biosynthesis	0.208264	0.93157	ko00514	LJ.18385.1;LJ.24548.1	K09667+K09667
Metabolism	Amino acid metabolism	Phenylalanine, tyrosine and tryptophan biosynthesis	0.21319	0.93157	ko00400	LJ.1543.1;evm.model.Cha02g008860;LJ.6081.1;LJ.13008.2;evm.model.Cha08g016510;evm.model.ChaUn11658.1	K00891+K13832+K00766+K15227+K01696+K01696
Metabolism	Biosynthesis of other secondary metabolites	Stilbenoid, diarylheptanoid and gingerol biosynthesis	0.224325	0.93157	ko00945	evm.model.Cha01g019530;LJ.28745.1	K00588+K13065
Metabolism	Lipid metabolism	Arachidonic acid metabolism	0.240474	0.93157	ko00590	LJ.23425.1;evm.model.ChaUn10910.3	K00432+K00432
Metabolism	Carbohydrate metabolism	Butanoate metabolism	0.241213	0.93157	ko00650	evm.model.Cha03g008630;evm.model.Cha10g002350;evm.model.ChaUn13015.1	K01652+K01640+K00074
Metabolism	Global and overview maps	Fatty acid metabolism	0.246011	0.93157	ko01212	LJ.1376.1;evm.model.Cha09g009960;LJ.23614.1;evm.model.Cha15g006360;LJ.30663.1;evm.model.ChaUn22024.2;LJ.35325.1	K10703+K03921+K01074+K10781+K09458+K00059+K00208
Metabolism	Amino acid metabolism	Tyrosine metabolism	0.26158	0.93157	ko00350	LJ.13496.1;LJ.18598.9;LJ.29910.1;LJ.32110.1;evm.model.ChaUn9626.1	K00276+K18857+K18857+K18857+K18857
Metabolism	Metabolism of cofactors and vitamins	Lipoic acid metabolism	0.265308	0.93157	ko00785	LJ.29842.1	K23735
Metabolism	Lipid metabolism	Fatty acid biosynthesis	0.290824	0.93157	ko00061	evm.model.Cha09g009960;evm.model.Cha15g006360;LJ.30663.1;evm.model.ChaUn22024.2;LJ.35325.1	K03921+K10781+K09458+K00059+K00208
Metabolism	Carbohydrate metabolism	Ascorbate and aldarate metabolism	0.294599	0.93157	ko00053	LJ.360.1;LJ.18647.1;LJ.22226.1;LJ.27519.1	K21888+K12447+K00434+K00469
Metabolism	Metabolism of terpenoids and polyketides	Zeatin biosynthesis	0.303535	0.93157	ko00908	evm.model.Cha01g004820;evm.model.Cha01g023540;evm.model.Cha06g013560;evm.model.ChaUn15428.5;LJ.33817.1	K23452+K23452+K13496+K23452+K10717
Metabolism	Metabolism of other amino acids	beta-Alanine metabolism	0.304398	0.93157	ko00410	LJ.13496.1;LJ.14946.1;evm.model.Cha11g009670;evm.model.Cha14g010120	K00276+K23146+K01918+K12259
Metabolism	Lipid metabolism	Fatty acid elongation	0.305258	0.93157	ko00062	LJ.1376.1;LJ.23614.1	K10703+K01074
Metabolism	Energy metabolism	Photosynthesis	0.31816	0.93157	ko00195	evm.model.Cha08g007550;LJ.21992.1;LJ.26941.1	K02639+K02639+K02639
Metabolism	Lipid metabolism	Biosynthesis of unsaturated fatty acids	0.32135	0.93157	ko01040	LJ.1376.1;evm.model.Cha09g009960	K10703+K03921
Genetic Information Processing	Transcription	RNA polymerase	0.329035	0.93157	ko03020	LJ.329.2;LJ.12455.3;LJ.16019.1;LJ.33224.1	K03024+K03025+K03026+K03013
Metabolism	Lipid metabolism	Glycerophospholipid metabolism	0.338533	0.93157	ko00564	LJ.16641.2;LJ.18195.2;LJ.25964.10;LJ.29856.1;LJ.30112.1;LJ.30113.1;evm.model.ChaUn21104.1;LJ.33534.1;evm.model.ChaUn7980.1;LJ.37869.1	K00968+K01613+K13523+K22389+K00550+K00550+K13508+K00981+K00981+K00981
Genetic Information Processing	Folding, sorting and degradation	Protein processing in endoplasmic reticulum	0.340226	0.93157	ko04141	evm.model.Cha01g016510;LJ.5559.4;evm.model.Cha03g013630;evm.model.Cha03g016280;LJ.9573.1;evm.model.Cha06g015350;LJ.14773.2;LJ.15372.1;LJ.16033.1;LJ.19616.5;LJ.22188.1;LJ.22296.1;LJ.24854.1;LJ.26543.1;LJ.26695.2;evm.model.ChaUn15635.3;evm.model.ChaUn15730.3;LJ.34965.1;evm.model.ChaUn8230.1;LJ.37311.1	K03094+K14004+K13993+K13993+K09562+K14026+K14009+K07953+K13989+K03347+K09481+K03283+K09487+K10578+K13993+K13993+K13993+K07953+K14009+K09503
Metabolism	Carbohydrate metabolism	Glyoxylate and dicarboxylate metabolism	0.392934	0.998976	ko00630	evm.model.Cha02g005110;LJ.11135.1;LJ.21519.2;LJ.23683.1;LJ.26181.1;evm.model.Cha14g003730;LJ.26952.1;LJ.28307.1	K22133+K11517+K02437+K02437+K11517+K19269+K02437+K00026
Metabolism	Metabolism of other amino acids	Phosphonate and phosphinate metabolism	0.397484	0.998976	ko00440	LJ.16641.2	K00968
Metabolism	Carbohydrate metabolism	C5-Branched dibasic acid metabolism	0.397484	0.998976	ko00660	evm.model.Cha03g008630	K01652
Metabolism	Glycan biosynthesis and metabolism	Glycosphingolipid biosynthesis - ganglio series	0.410621	0.998976	ko00604	evm.model.ChaUn9213.1	K12309
Metabolism	Metabolism of terpenoids and polyketides	Monoterpenoid biosynthesis	0.415245	0.998976	ko00902	evm.model.Cha05g007290;evm.model.Cha06g007820	K15086+K15095
Metabolism	Global and overview maps	Metabolic pathways	0.431041	0.998976	ko01100	LJ.360.1;LJ.404.1;evm.model.Cha01g004940;LJ.640.1;LJ.1376.1;LJ.1543.1;LJ.1921.1;evm.model.Cha01g018470;evm.model.Cha01g019530;LJ.3148.1;LJ.3253.1;evm.model.Cha02g005110;LJ.3348.1;evm.model.Cha02g008860;LJ.4061.1;LJ.5436.1;evm.model.Cha03g004270;evm.model.Cha03g005590;evm.model.Cha03g005580;evm.model.Cha03g007350;evm.model.Cha03g008630;LJ.5969.1;LJ.5999.1;LJ.6081.1;LJ.6194.1;LJ.6573.1;evm.model.Ch…	K21888+K01803+K01100+K00430+K10703+K00891+K00234+K01762+K00588+K01733+K00948+K22133+K01599+K13832+K22207+K12640+K01183+K12638+K12638+K00818+K01652+K01493+K01598+K00766+K05278+K00021+K13082+K00826+K00030+K00966+K15633+K08967+K01535+K00430+K11517+K00799+K11414+K00872+K18819+K01183+K21456+K17398+K01051+K15227+K01051+K00020+K00276+K23095+K01188+K00799+K04712+K08695+K23146+K01051+K04711+K01069+K00968+…
Metabolism	Lipid metabolism	Synthesis and degradation of ketone bodies	0.448342	0.998976	ko00072	evm.model.Cha10g002350	K01640
Genetic Information Processing	Folding, sorting and degradation	Sulfur relay system	0.448342	0.998976	ko04122	LJ.24919.1	K14169
Metabolism	Carbohydrate metabolism	Pentose phosphate pathway	0.479231	0.998976	ko00030	LJ.3253.1;evm.model.Cha10g010990;LJ.23671.1;LJ.33522.1;LJ.34871.1	K00948+K01807+K00948+K01783+K01057
Metabolism	Amino acid metabolism	Cysteine and methionine metabolism	0.495535	0.998976	ko00270	evm.model.Cha01g018470;LJ.4061.1;LJ.6950.2;evm.model.Cha05g002890;LJ.12908.1;LJ.12928.2;LJ.28307.1;evm.model.ChaUn19321.1;evm.model.ChaUn6927.8	K01762+K22207+K00826+K08967+K21456+K17398+K00026+K00899+K01739
Cellular Processes	Transport and catabolism	Autophagy - other eukaryotes	0.499217	0.998976	ko04136	LJ.12745.1;LJ.17031.1;LJ.22757.1;LJ.31321.1	K19730+K08341+K17907+K07203
Genetic Information Processing	Transcription	Basal transcription factors	0.522227	0.998976	ko03022	LJ.14106.1;LJ.14822.1;LJ.24968.1;LJ.25851.1	K03135+K03138+K03124+K03127
Metabolism	Amino acid metabolism	Arginine biosynthesis	0.524918	0.998976	ko00220	evm.model.Cha03g007350;LJ.26323.2;evm.model.ChaUn14401.1	K00818+K00814+K01438
Organismal Systems	Environmental adaptation	Plant-pathogen interaction	0.554648	0.998976	ko04626	LJ.1413.1;LJ.4947.8;LJ.6682.1;LJ.11612.1;evm.model.Cha06g002260;LJ.15522.1;LJ.18885.1;evm.model.Cha10g001500;LJ.24854.1;LJ.25375.4;LJ.25648.1;LJ.28010.1;LJ.29843.1;LJ.33920.1;evm.model.ChaUn8338.1;LJ.38263.1	K13448+K13412+K13412+K13448+K13448+K13412+K14512+K13448+K09487+K05391+K13429+K13448+K01373+K13412+K13448+K13448
Metabolism	Glycan biosynthesis and metabolism	Glycosaminoglycan degradation	0.557531	0.998976	ko00531	evm.model.ChaUn9213.1	K12309
Metabolism	Energy metabolism	Oxidative phosphorylation	0.561024	0.998976	ko00190	LJ.1921.1;evm.model.Cha05g005530;LJ.20185.1;LJ.20833.1;evm.model.Cha10g015190;LJ.30193.1;LJ.35238.1;LJ.36298.1;LJ.37281.1;evm.model.ChaUn11824.2	K00234+K01535+K03945+K03940+K00411+K03945+K05577+K02151+K03941+K03934
Metabolism	Amino acid metabolism	Valine, leucine and isoleucine degradation	0.579549	0.998976	ko00280	LJ.6950.2;evm.model.Cha06g013700;LJ.14946.1;evm.model.Cha10g002350	K00826+K00020+K23146+K01640
Metabolism	Glycan biosynthesis and metabolism	Glycosphingolipid biosynthesis - globo and isoglobo series	0.585871	0.998976	ko00603	LJ.24779.5	K07407
Genetic Information Processing	Translation	mRNA surveillance pathway	0.614597	0.998976	ko03015	LJ.2057.1;LJ.3017.1;LJ.3221.1;LJ.3258.1;evm.model.Cha10g002110;LJ.25968.1;evm.model.Cha15g000430;LJ.37264.1;LJ.37859.1;evm.model.ChaUn21836.1	K14376+K14324+K13126+K14411+K14409+K14411+K15544+K12876+K06269+K13126
Metabolism	Amino acid metabolism	Alanine, aspartate and glutamate metabolism	0.624855	0.998976	ko00250	LJ.20967.1;LJ.26323.2;LJ.31129.2;LJ.34396.1	K13566+K00814+K13051+K13566
Metabolism	Carbohydrate metabolism	Amino sugar and nucleotide sugar metabolism	0.638709	0.998976	ko00520	evm.model.Cha03g004270;evm.model.Cha04g020820;LJ.12688.1;LJ.18647.1;evm.model.Cha10g004450;evm.model.Cha10g009510;LJ.29501.1;LJ.31762.3;LJ.37843.1	K01183+K00966+K01183+K12447+K08678+K01183+K00966+K00326+K01784
Genetic Information Processing	Replication and repair	Non-homologous end-joining	0.645157	0.998976	ko03450	LJ.33900.1	K10886
Metabolism	Glycan biosynthesis and metabolism	Other glycan degradation	0.654616	0.998976	ko00511	LJ.29733.1;evm.model.ChaUn9213.1	K01190+K12309
Genetic Information Processing	Folding, sorting and degradation	Proteasome	0.655012	0.998976	ko03050	evm.model.Cha05g002620;evm.model.Cha07g009710;evm.model.Cha15g008900;LJ.31677.1;evm.model.ChaUn7204.2	K02734+K02739+K03066+K03031+K03039
Genetic Information Processing	Folding, sorting and degradation	RNA degradation	0.659491	0.998976	ko03018	LJ.3221.1;LJ.10087.1;LJ.21035.1;LJ.22899.1;evm.model.Cha13g004710;LJ.25735.1;LJ.32325.1;evm.model.ChaUn8407.3;evm.model.ChaUn21836.1	K13126+K12626+K12625+K12621+K12581+K12621+K01148+K12608+K13126
Metabolism	Metabolism of terpenoids and polyketides	Terpenoid backbone biosynthesis	0.676389	0.998976	ko00900	LJ.1640.6;LJ.6573.1;evm.model.ChaUn31654.1	K05906+K00021+K00021
Metabolism	Global and overview maps	Carbon metabolism	0.679167	0.998976	ko01200	LJ.404.1;evm.model.Cha01g004940;LJ.1921.1;LJ.3253.1;LJ.9418.1;LJ.9821.1;LJ.11135.1;LJ.14946.1;evm.model.Cha10g006950;evm.model.Cha10g010990;LJ.21519.2;LJ.23671.1;LJ.23683.1;LJ.26181.1;LJ.26323.2;evm.model.Cha14g003730;LJ.26952.1;LJ.28307.1;evm.model.ChaUn13015.1;LJ.32131.1;LJ.33522.1;LJ.34871.1	K01803+K01100+K00234+K00948+K00030+K15633+K11517+K23146+K00030+K01807+K02437+K00948+K02437+K11517+K00814+K19269+K02437+K00026+K00074+K00927+K01783+K01057
Genetic Information Processing	Translation	RNA transport	0.694442	0.998976	ko03013	LJ.3017.1;LJ.3221.1;LJ.4712.1;LJ.5559.4;LJ.9396.1;LJ.10935.1;evm.model.Cha05g014720;evm.model.Cha13g012750;LJ.29409.3;evm.model.ChaUn10361.3;LJ.37027.1;LJ.37061.1;LJ.37264.1;evm.model.ChaUn21836.1	K14324+K13126+K14299+K14004+K09291+K12160+K03236+K14298+K14307+K03231+K03241+K14313+K12876+K13126
Cellular Processes	Transport and catabolism	Endocytosis	0.699788	0.998976	ko04144	evm.model.Cha01g023290;LJ.3711.2;LJ.9358.1;LJ.12364.3;LJ.13259.1;evm.model.Cha10g000750;LJ.21387.1;LJ.22296.1;evm.model.ChaUn35155.2;LJ.35156.1	K18467+K12190+K07901+K12191+K12194+K07904+K07937+K03283+K18467+K01528
Metabolism	Amino acid metabolism	Histidine metabolism	0.709114	0.998976	ko00340	evm.model.ChaUn24806.1	K00765
Metabolism	Amino acid metabolism	Phenylalanine metabolism	0.713445	0.998976	ko00360	LJ.13496.1;evm.model.ChaUn13015.1	K00276+K00074
Genetic Information Processing	Folding, sorting and degradation	Protein export	0.715724	0.998976	ko03060	LJ.1986.1;LJ.12580.1;LJ.22188.1	K03106+K03110+K09481
Metabolism	Energy metabolism	Carbon fixation in photosynthetic organisms	0.719717	0.998976	ko00710	LJ.404.1;evm.model.Cha01g004940;evm.model.Cha10g010990;LJ.26323.2;LJ.28307.1;LJ.32131.1;LJ.33522.1	K01803+K01100+K01807+K00814+K00026+K00927+K01783
Metabolism	Metabolism of terpenoids and polyketides	Sesquiterpenoid and triterpenoid biosynthesis	0.727766	0.998976	ko00909	evm.model.Cha14g000120	K14184
Metabolism	Glycan biosynthesis and metabolism	Glycosylphosphatidylinositol(GPI)-anchor biosynthesis	0.743731	0.998976	ko00563	LJ.28841.3;evm.model.ChaUn21130.1	K03861+K05289
Metabolism	Metabolism of cofactors and vitamins	Porphyrin and chlorophyll metabolism	0.743731	0.998976	ko00860	LJ.3348.1;evm.model.ChaUn4002.3	K01599+K00228
Metabolism	Carbohydrate metabolism	Citrate cycle (TCA cycle)	0.744168	0.998976	ko00020	LJ.1921.1;LJ.9418.1;evm.model.Cha10g006950;LJ.28307.1	K00234+K00030+K00030+K00026
Metabolism	Metabolism of cofactors and vitamins	Folate biosynthesis	0.766781	0.998976	ko00790	LJ.17317.1	K18482
Genetic Information Processing	Replication and repair	Mismatch repair	0.782221	0.998976	ko03430	evm.model.Cha01g024140;LJ.31865.1	K07466+K08734
Metabolism	Biosynthesis of other secondary metabolites	Isoquinoline alkaloid biosynthesis	0.786517	0.998976	ko00950	LJ.13496.1	K00276
Genetic Information Processing	Translation	Aminoacyl-tRNA biosynthesis	0.79499	0.998976	ko00970	LJ.28887.1;LJ.29421.1;LJ.32437.1;LJ.32438.1;LJ.37633.2	K02435+K01870+K22503+K22503+K01881
Metabolism	Metabolism of cofactors and vitamins	Nicotinate and nicotinamide metabolism	0.825045	0.998976	ko00760	LJ.11598.1	K11414
Genetic Information Processing	Folding, sorting and degradation	Ubiquitin mediated proteolysis	0.828001	0.998976	ko04120	evm.model.Cha01g016510;LJ.13609.2;LJ.16877.1;LJ.19616.5;LJ.26543.1;LJ.32879.1;LJ.37681.1;LJ.37838.1	K03094+K10573+K10581+K03347+K10578+K04649+K04649+K10581
Genetic Information Processing	Replication and repair	DNA replication	0.849486	0.998976	ko03030	evm.model.Cha01g024140;LJ.16803.1	K07466+K10745
Genetic Information Processing	Transcription	Spliceosome	0.851104	0.998976	ko03040	LJ.10087.1;LJ.11603.2;LJ.16459.1;LJ.19324.1;LJ.21035.1;LJ.22296.1;evm.model.Cha11g011400;LJ.22899.1;LJ.24906.1;LJ.25735.1;LJ.29351.1;LJ.37264.1	K12626+K11087+K11098+K12832+K12625+K03283+K11087+K12621+K12852+K12621+K12848+K12876
Metabolism	Metabolism of other amino acids	Cyanoamino acid metabolism	0.854557	0.998976	ko00460	evm.model.Cha06g018600;LJ.31129.2	K01188+K13051
Metabolism	Glycan biosynthesis and metabolism	N-Glycan biosynthesis	0.857021	0.998976	ko00510	LJ.4779.1;LJ.17271.1;LJ.19981.1	K12345+K03843+K01001
Metabolism	Carbohydrate metabolism	Fructose and mannose metabolism	0.861197	0.998976	ko00051	LJ.404.1;evm.model.Cha04g020820;LJ.29501.1	K01803+K00966+K00966
Metabolism	Biosynthesis of other secondary metabolites	Tropane, piperidine and pyridine alkaloid biosynthesis	0.862843	0.998976	ko00960	LJ.13496.1	K00276
Genetic Information Processing	Replication and repair	Homologous recombination	0.879766	0.998976	ko03440	evm.model.Cha01g024140;evm.model.Cha13g001170	K07466+K20776
Metabolism	Lipid metabolism	Glycerolipid metabolism	0.882305	0.998976	ko00561	LJ.24779.5;LJ.25964.10;evm.model.ChaUn21104.1	K07407+K13523+K13508
Metabolism	Energy metabolism	Sulfur metabolism	0.90161	0.998976	ko00920	evm.model.ChaUn6927.8	K01739
Environmental Information Processing	Signal transduction	Phosphatidylinositol signaling system	0.91212	0.998976	ko04070	LJ.33534.1;evm.model.ChaUn7980.1;LJ.37869.1	K00981+K00981+K00981
Environmental Information Processing	Signal transduction	MAPK signaling pathway - plant	0.918417	0.998976	ko04016	LJ.68.6;LJ.14142.1;LJ.18002.2;LJ.18885.1;LJ.23905.1;LJ.30881.1	K14509+K17686+K20535+K14512+K20726+K14496
Metabolism	Lipid metabolism	Steroid biosynthesis	0.922897	0.998976	ko00100	LJ.23524.2	K14423
Metabolism	Carbohydrate metabolism	Glycolysis / Gluconeogenesis	0.927441	0.998976	ko00010	LJ.404.1;LJ.9821.1;LJ.18598.9;LJ.29910.1;LJ.32110.1;LJ.32131.1;evm.model.ChaUn9626.1	K01803+K15633+K18857+K18857+K18857+K00927+K18857
Organismal Systems	Environmental adaptation	Circadian rhythm - plant	0.929442	0.998976	ko04712	LJ.14914.1	K03115
Metabolism	Energy metabolism	Nitrogen metabolism	0.933983	0.998976	ko00910	LJ.19308.1	K01725
Cellular Processes	Transport and catabolism	Peroxisome	0.948176	0.998976	ko04146	LJ.11135.1;evm.model.Cha10g002350;LJ.24416.1;LJ.26181.1	K11517+K01640+K00477+K11517
Metabolism	Carbohydrate metabolism	Inositol phosphate metabolism	0.951374	0.998976	ko00562	LJ.404.1;LJ.27519.1;LJ.30392.1	K01803+K00469+K01765
Genetic Information Processing	Folding, sorting and degradation	SNARE interactions in vesicular transport	0.958578	0.998976	ko04130	LJ.10677.1	K08505
Metabolism	Amino acid metabolism	Lysine degradation	0.961249	0.998976	ko00310	evm.model.ChaUn8718.2	K11426
Metabolism	Carbohydrate metabolism	Propanoate metabolism	0.9621	0.998976	ko00640	LJ.14946.1	K23146
Cellular Processes	Transport and catabolism	Phagosome	0.971453	0.998976	ko04145	LJ.3080.1;LJ.22188.1;LJ.36298.1	K04392+K09481+K02151
Metabolism	Amino acid metabolism	Tryptophan metabolism	0.977271	0.998976	ko00380	evm.model.ChaUn8071.1	K11820
Metabolism	Glycan biosynthesis and metabolism	Various types of N-glycan biosynthesis	0.980112	0.998976	ko00513	LJ.17271.1	K03843
Metabolism	Amino acid metabolism	Arginine and proline metabolism	0.98055	0.998976	ko00330	evm.model.Cha14g010120	K12259
Genetic Information Processing	Translation	Ribosome biogenesis in eukaryotes	0.980731	0.998976	ko03008	LJ.2317.1;LJ.14914.1;LJ.34550.1	K03264+K03115+K14571
Genetic Information Processing	Replication and repair	Nucleotide excision repair	0.984775	0.998976	ko03420	evm.model.Cha01g024140	K07466
Metabolism	Nucleotide metabolism	Pyrimidine metabolism	0.994165	0.998976	ko00240	LJ.5969.1	K01493
Metabolism	Carbohydrate metabolism	Starch and sucrose metabolism	0.997934	0.998976	ko00500	evm.model.Cha06g018600;LJ.26773.1;LJ.36502.1	K01188+K01177+K07024
Metabolism	Nucleotide metabolism	Purine metabolism	0.998301	0.998976	ko00230	LJ.3253.1;LJ.23671.1	K00948+K00948
Metabolism	Carbohydrate metabolism	Pyruvate metabolism	0.998976	0.998976	ko00620	LJ.16075.1;LJ.28307.1	K01069+K00026
